# Supplementary material for: A-FABP in Metabolic Diseases and the Therapeutic Implications: An Update
Source: MDPI journal article supplement (doi:10.3390/ijms22179386), 2021-08-30
Supplement: s1 [file ijms-1364365-supplementary.pdf › ijms-1364365-supplementary.pdf]

Central Illustration. Diseases associated with A-FABP and benefits of A-FABP inhibition

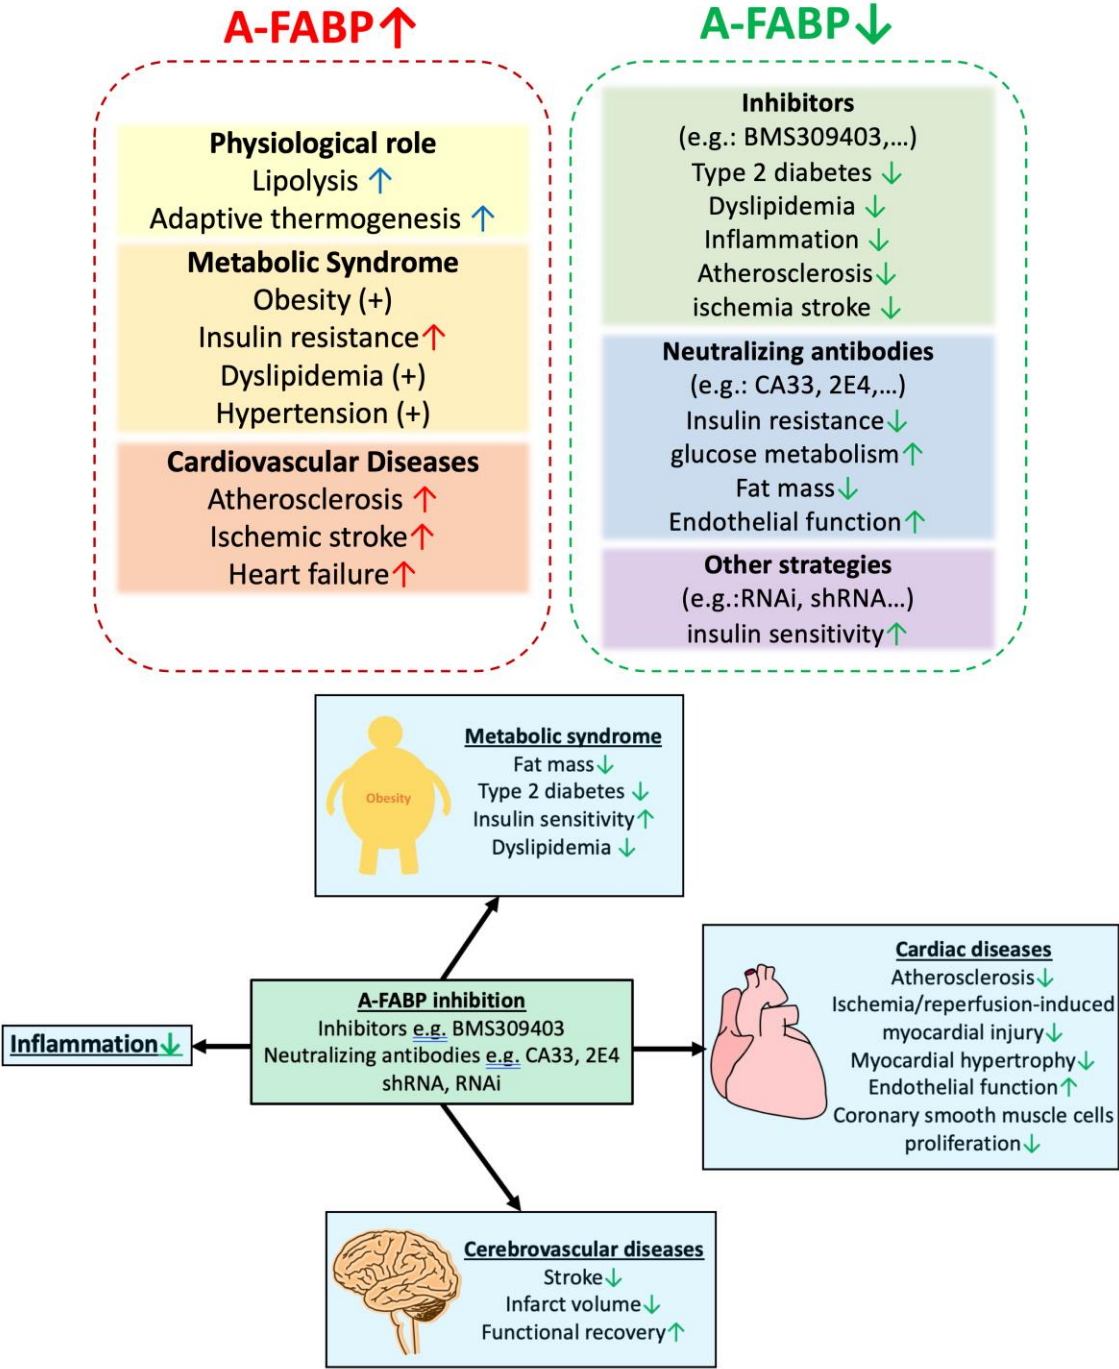

↑: stimulation; ↓ suppression; (+) positive correlation
